# Supplementary material for: Photomechanical effect in Zn(ii) and Cd(ii) 1D coordination polymers: photosalient to non-salient behaviour
Source: Royal Society of Chemistry journal article supplement (doi:10.1039/d2cc04135a), 2022-01-01
Supplement: d2cc04135a1.pdf [file d2cc04135a1.pdf]

# Photomechanical effect in Zn(II) and Cd(II) 1D coordination polymers: photosalient to non-salient behaviour

Samim Khan,<sup>a</sup> Sanobar Naaz,<sup>a</sup> Akansha Ekka,<sup>b</sup> Basudeb Dutta,<sup>a</sup> Sourav Roy,<sup>c</sup> Raghavender Medishetty <sup>\*b</sup> and Mohammad Hedayetullah Mir<sup>\*a</sup>

<sup>a</sup>Department of Chemistry, Aliah University, New Town, Kolkata 700 156, India.

<sup>b</sup>Department of Chemistry, IIT Bhilai, Sejbahar, Raipur, Chhattisgarh 492015, India

<sup>c</sup>Solid State and Structural Chemistry Unit, Indian Institute of Science, Bangalore 560 012, India

## Electronic Supplementary Information

## Experimental Procedures

### Materials and general method

All chemicals purchased were reagent grade and were used without further purification. Elemental analysis (carbon, hydrogen and nitrogen) was performed on a Perkin–Elmer 240C elemental analyzer. Infrared spectrum in KBr ( $4500\text{--}500\text{ cm}^{-1}$ ) was recorded using a Perkin–Elmer FT-IR spectrum RX1 spectrometer.  $^1\text{H}$  NMR spectra were recorded on a 400 MHz Bruker Avance 400 FT NMR spectrometer with TMS as an internal reference in  $\text{DMSO-}d_6$  solution. The solid-state photoluminescence measurements were made using Horiba Fluorolog with a solid-state sample holder. The solid-state photoluminescence measurements were made using Horiba Jobin Yvon Fluoromax-4 Spectrophotometer (Excitation wavelength – 390 nm) with a solid-state sample holder. CARL ZEISS UHR Field Emission Scanning Electron Microscope (FESEM) was used for SEM images. Photodimerization reaction was carried out using Luzchem photoreactor (8 W UVA lamps) at  $\sim 350\text{ nm}$  at room temperature. Crystalline ground powder was packed between the glass slides and irradiated under UV light. Glass slides were flipped at regular intervals of time to maintain uniform exposure of UV radiation. Photosalient effects were studied by irradiating good quality single crystal with UV light using Xe-source using MAX-350 optical photoreactor under a microscope equipped with a high-quality camera for capturing videos.

### Synthesis of the compounds

**Synthesis of 1:** A solution of 4-nvp (0.046 g, 0.2 mmol) in MeOH (2 mL) was slowly and carefully layered onto a solution of  $\text{Zn}(\text{NO}_3)_2 \cdot 6\text{H}_2\text{O}$  (0.059 g, 0.2 mmol), in  $\text{H}_2\text{O}$  (2 mL) using a 2 mL 1 : 1 (= v/v) solution of MeOH and  $\text{H}_2\text{O}$  followed by layering of 1,4- $\text{H}_2\text{chdc}$  (0.034 g, 0.2 mmol) neutralized with  $\text{Et}_3\text{N}$  (0.042 g, 0.4 mmol) in 2 mL EtOH. The light yellow colour needle shaped crystals of  $[\text{Zn}(4\text{-nvp})(\text{cis-1,4-chdc})]$  (**1**), were obtained after six days (0.060 g, yield 65%). Elemental analysis (%) calcd for  $\text{C}_{25}\text{H}_{23}\text{NO}_4\text{Zn}$ : C, 64.32; H, 4.97; N, 3.00; found: C 64.5, H 4.6, N 3.2. IR (KBr pellet,  $\text{cm}^{-1}$ ): 1611  $\nu_{\text{as}}(\text{COO}^-)$ , 1408  $\nu_{\text{sys}}(\text{COO}^-)$ .

**Synthesis of 2:** A solution of 4-nvp (0.046 g, 0.2 mmol) in MeOH (2 mL) was slowly and carefully layered onto a solution of  $\text{Cd}(\text{NO}_3)_2 \cdot 4\text{H}_2\text{O}$  (0.062 g, 0.2 mmol), in  $\text{H}_2\text{O}$  (2 mL) using a 2 mL 1 : 1 (= v/v) solution of MeOH and  $\text{H}_2\text{O}$  followed by layering of 1,4- $\text{H}_2\text{chdc}$  (0.034 g, 0.2 mmol) neutralized with  $\text{Et}_3\text{N}$  (0.042 g, 0.4mmol) in 2 mL EtOH. The light yellow colour block

shaped crystals of [Cd(4-nvp)(cis-1,4-chdc)] (**2**), were obtained after ten days (0.060 g, yield 59%). Elemental analysis (%) calcd for C<sub>25</sub>H<sub>23</sub>CdNO<sub>4</sub>: C, 61.23; H, 4.73; N, 2.86; found: C, 61.5; H, 4.4; N, 2.6. IR (KBr pellet, cm<sup>-1</sup>): 1542  $\nu_{\text{as}}(\text{COO}^-)$ , 1420  $\nu_{\text{sys}}(\text{COO}^-)$ .

### General X-ray Crystallography

Single crystals of **1** and **2** having suitable dimensions, were used for data collection using a Bruker SMART APEX II diffractometer equipped with graphite-monochromated MoK $\alpha$  radiation ( $\lambda$ , 0.71073 Å). The crystal structure was solved using the SHELXT 2014/4 structure solution program package.<sup>1</sup> Least squares refinements of all reflections within the hkl range  $-11 \leq h \leq 11$ ,  $-12 \leq k \leq 12$ ,  $-16 \leq l \leq 16$  for **1**  $-12 \leq h \leq 12$ ,  $-12 \leq k \leq 12$ ,  $-16 \leq l \leq 16$  for **2** were used to figure out the unit cell parameters and crystal-orientation matrices. The collected data ( $I > 2\sigma(I)$ ) was integrated by using SAINT<sup>2</sup> program, and the absorption correction was done by SADABS.<sup>3</sup> Non-hydrogen atoms were refined by the help of anisotropic thermal parameters. All the hydrogen atoms were placed in their geometrically perfect positions and constrained to ride on their parent atoms.

**Table S1** Crystal data and refinement parameters for compound **1** and **2**

|                                               |                                                                 |                                                                |
|-----------------------------------------------|-----------------------------------------------------------------|----------------------------------------------------------------|
| Formula                                       | C <sub>25</sub> H <sub>23</sub> NO <sub>4</sub> Zn ( <b>1</b> ) | C <sub>25</sub> H <sub>23</sub> CdNO <sub>4</sub> ( <b>2</b> ) |
| fw                                            | 466.83                                                          | 513.85                                                         |
| cryst syst                                    | Triclinic                                                       | Triclinic                                                      |
| space group                                   | $P\bar{1}$                                                      | $P\bar{1}$                                                     |
| $a$ (Å)                                       | 8.6664(6)                                                       | 9.4781(16)                                                     |
| $b$ (Å)                                       | 9.5962(7)                                                       | 9.8709(16)                                                     |
| $c$ (Å)                                       | 12.8603(9)                                                      | 12.141(2)                                                      |
| $\alpha$ (deg)                                | 79.050(2)                                                       | 97.577(4)                                                      |
| $\beta$ (deg)                                 | 88.970(2)                                                       | 102.802(4)                                                     |
| $\gamma$ (deg)                                | 84.185(2)                                                       | 102.063(4)                                                     |
| $V$ (Å <sup>3</sup> )                         | 1044.64(13)                                                     | 1064.1(3)                                                      |
| $Z$                                           | 2                                                               | 2                                                              |
| $D_{\text{calcd}}$ (g/cm <sup>3</sup> )       | 1.484                                                           | 1.604                                                          |
| $\mu$ (mm <sup>-1</sup> )                     | 1.208                                                           | 1.058                                                          |
| T (K)                                         | 273(2)                                                          | 273(2)                                                         |
| $\lambda$ (Å)                                 | 0.71073                                                         | 0.71073                                                        |
| GOF on $F^2$                                  | 1.069                                                           | 1.056                                                          |
| FinalR<br>indices<br>$[I > 2\sigma(I)]^{a,b}$ | $R1 = 0.0221$<br>$wR2 = 0.0585$                                 | $R1 = 0.0305$<br>$wR2 = 0.0803$                                |

$$^a R1 = \sum ||F_o| - |F_c|| / \sum |F_o|, \quad ^b wR2 = [\sum w(F_o^2 - F_c^2)^2 / \sum w(F_o^2)^2]^{1/2}$$

**Table S2** Selected bond lengths and bond angles **1**

| <b>Bond length (Å)</b> |            |
|------------------------|------------|
| Zn(1)-O(1)             | 2.0343(11) |
| Zn(1)-N(1)             | 2.0369(12) |
| Zn(1)-O(3)a            | 2.0562(12) |
| Zn(1)-O(2)c            | 2.0327(12) |
| Zn(1)-O(4)d            | 2.0680(12) |
| <b>Bond angle (°)</b>  |            |
| O(1)-Zn(1)-N(1)        | 100.18(5)  |
| O(1)-Zn(1)-O(3)a       | 90.63(5)   |
| O(1)-Zn(1)-O(2)c       | 160.62(5)  |
| O(1)-Zn(1)-O(4)d       | 87.73(5)   |
| O(3)a-Zn(1)-N(1)       | 103.46(5)  |
| O(2)c-Zn(1)-N(1)       | 99.07(5)   |
| O(4)d-Zn(1)-N(1)       | 95.84(5)   |
| O(2)c-Zn(1)-O(3)a      | 87.08(5)   |
| O(3)a-Zn(1)-O(4)d      | 160.61(5)  |
| O(2)c-Zn(1)-O(4)d      | 88.10(5)   |

Symmetry transformation a = -1+x,y,z; c = -x,2-y,2-z; d = 1-x,2-y,2-z

**Table S3** Selected bond lengths and bond angles **2**

| <b>Bond length (Å)</b> |            |
|------------------------|------------|
| Cd(1)-O(1)             | 2.204(3)   |
| Cd(1)-N(1)             | 2.280(3)   |
| Cd(1)-O(3)a            | 2.317(3)   |
| Cd(1)-O(4)a            | 2.330(4)   |
| Cd(1)-O(2)b            | 2.223(3)   |
| <b>Bond angle (°)</b>  |            |
| O(1)-Cd(1)-N(1)        | 97.09(10)  |
| O(1)-Cd(1)-O(3)a       | 101.43(10) |
| O(1)-Cd(1)-O(4)a       | 133.75(12) |
| O(1)-Cd(1)-C(25)a      | 120.90(10) |
| O(1)-Cd(1)-O(2)b       | 115.74(11) |
| O(3)a-Cd(1)-N(1)       | 135.65(10) |
| O(4)a-Cd(1)-N(1)       | 83.64(12)  |
| N(1)-Cd(1)-C(25)a      | 110.21(10) |
| O(2)b-Cd(1)-N(1)       | 93.55(11)  |
| O(3)a-Cd(1)-O(4)a      | 54.72(11)  |
| O(3)a-Cd(1)-C(25)a     | 27.38(10)  |
| O(2)b-Cd(1)-O(3)a      | 113.33(11) |
| O(4)a-Cd(1)-C(25)a     | 27.38(12)  |
| O(2)b-Cd(1)-O(4)a      | 110.34(13) |
| O(2)b-Cd(1)-C(25)a     | 113.66(10) |

Symmetry transformation a =1-x,2-y,-z; b =2-x,2-y,-z

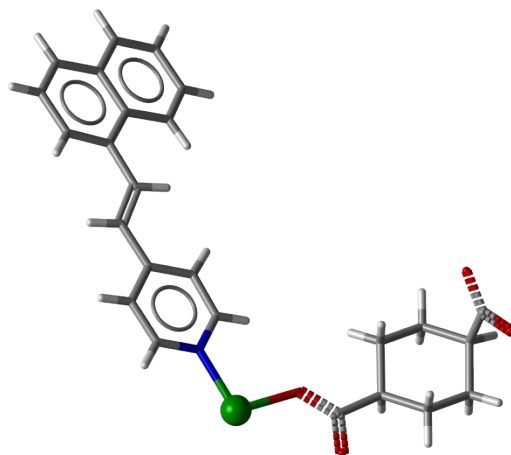

**Fig. S1** Asymmetric view of compound 2.

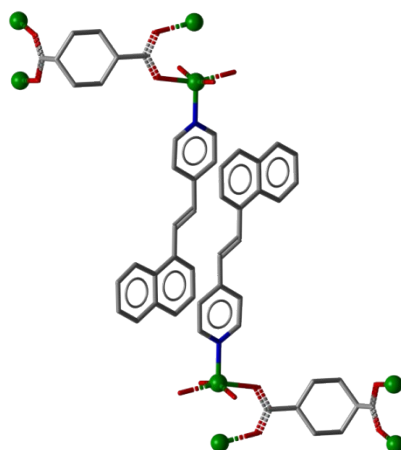

**Fig. S2** Alignment of 4-nvp ligands in compound 2. Hydrogen atoms are omitted for clarity.

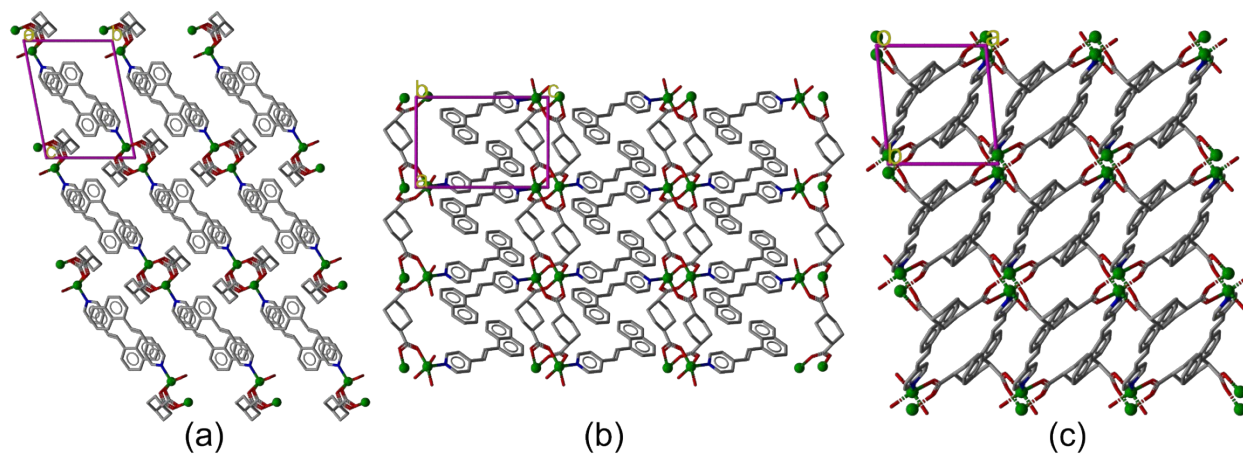

**Fig. S3** Single-crystal structure of 1 viewed along different cell axes.

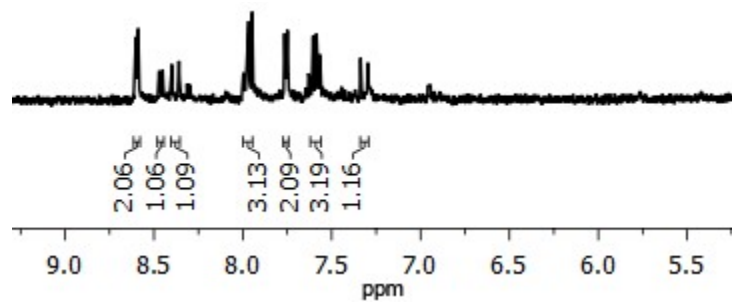

**Fig. S4**  $^1\text{H}$  NMR spectrum (400 MHz,  $\text{DMSO-d}_6$ ) of compound **1**.

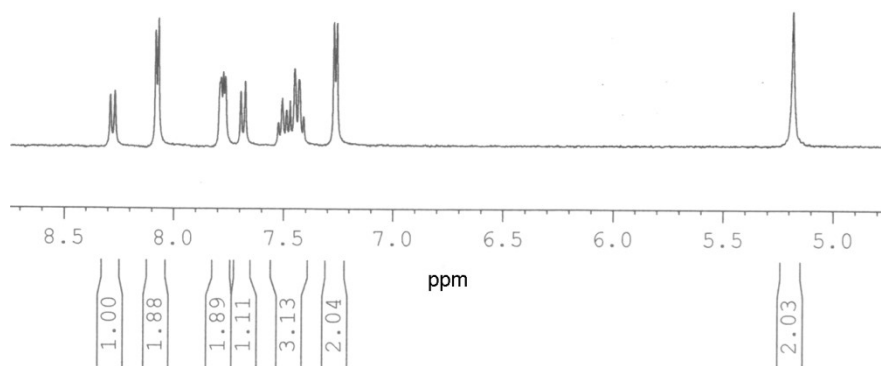

**Fig. S5**  $^1\text{H}$  NMR spectrum (400 MHz,  $\text{DMSO-d}_6$ ) of dimerized *rctt*-4-pncb.

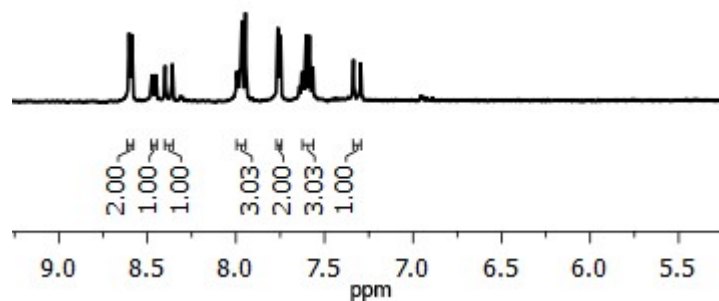

**Fig. S6**  $^1\text{H}$  NMR spectrum (400 MHz,  $\text{DMSO-d}_6$ ) of compound **2**.

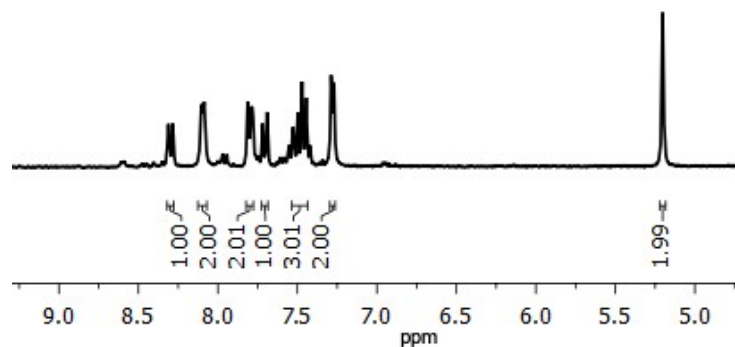

**Fig. S7**  $^1\text{H}$  NMR spectrum ( $\text{DMSO-d}_6$ ) of compound **2** after UV irradiation.

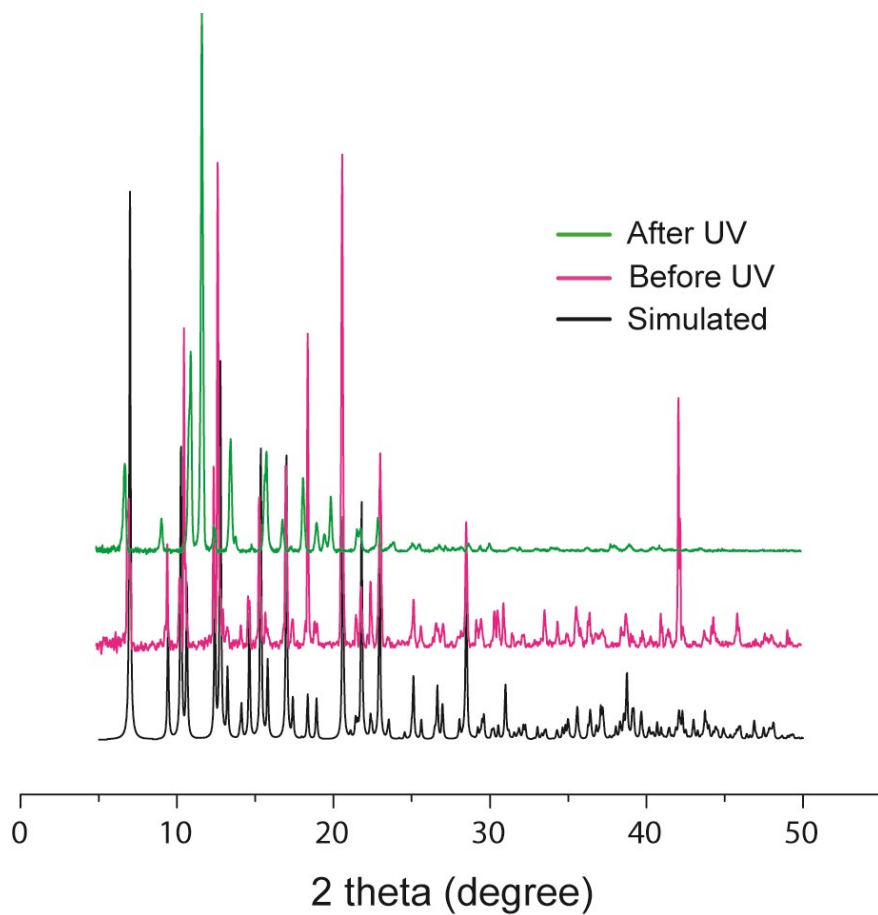

**Fig. S8** PXRD patterns of simulated **1** (black), before (magenta) and after UV irradiation (olive).

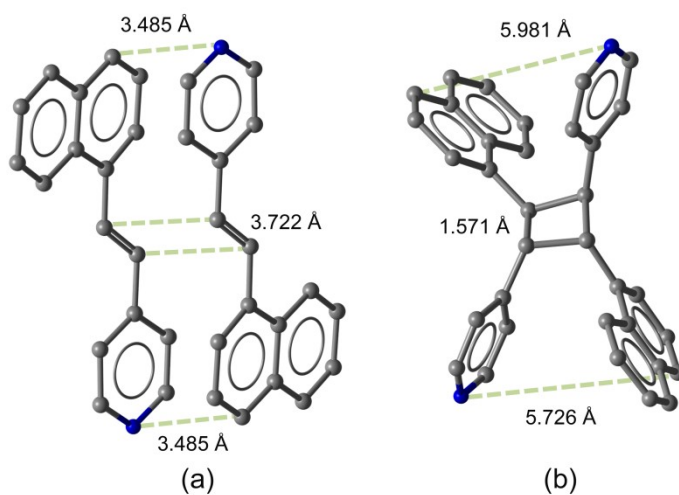

**Fig. S9** Comparison between (a) aligned 4-nvp ligands in **1** and (b) isolated dimerized *rctt*-4-*pncb*.

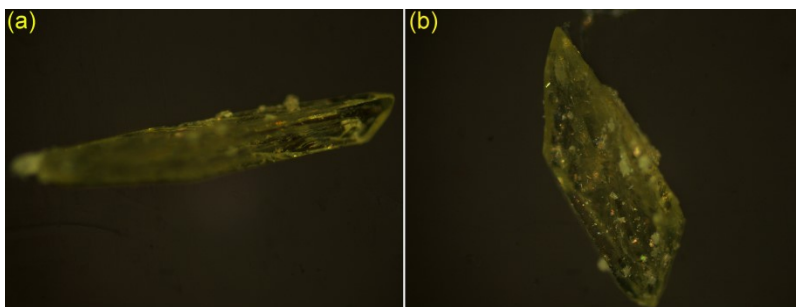

**Fig. S10** Morphology dependent PS effect in **1** involving (a) needle crystal (fast photomechanical motion) and (b) thick crystal (slow motion).

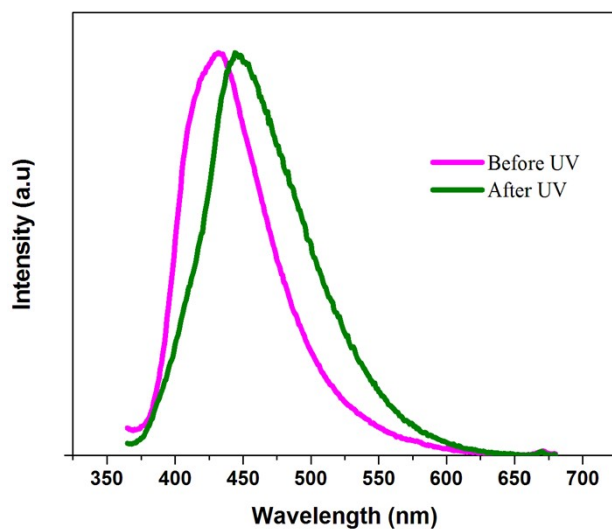

**Fig. S11** Solid state photoluminescence spectra of **1** (before and after UV irradiation; excitation wavelength 350 nm with slit 3 nm).

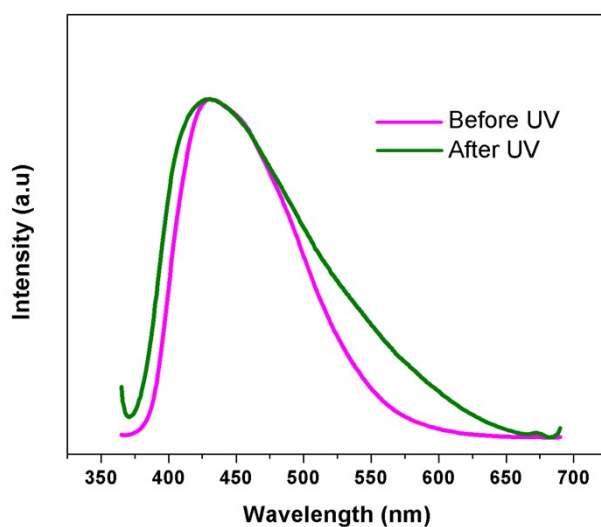

**Fig. S12** Solid state photoluminescence spectra of **2** (before and after UV irradiation; excitation wavelength 350 nm with slit 3 nm).

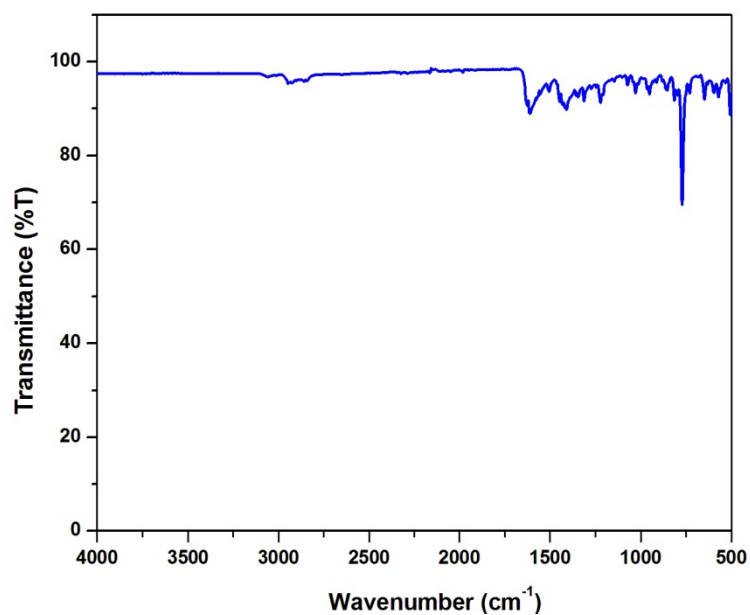

**Fig. S13** IR spectrum of **1** before UV irradiation.

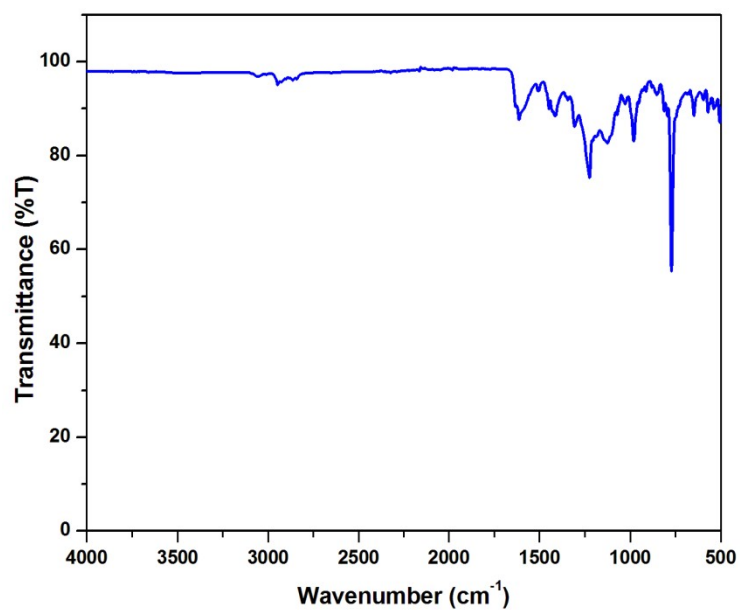

**Fig. S14** IR spectrum of **1** after UV irradiation.

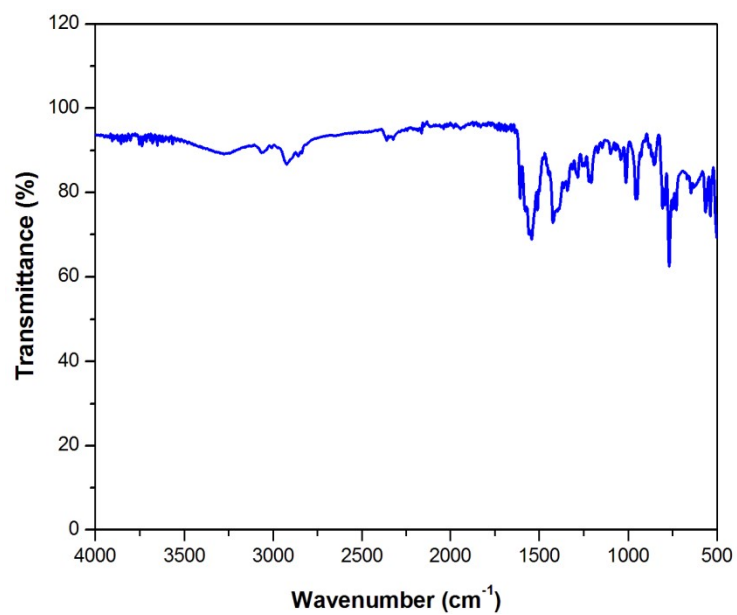

**Fig. S15** IR spectrum of **2** before UV irradiation.

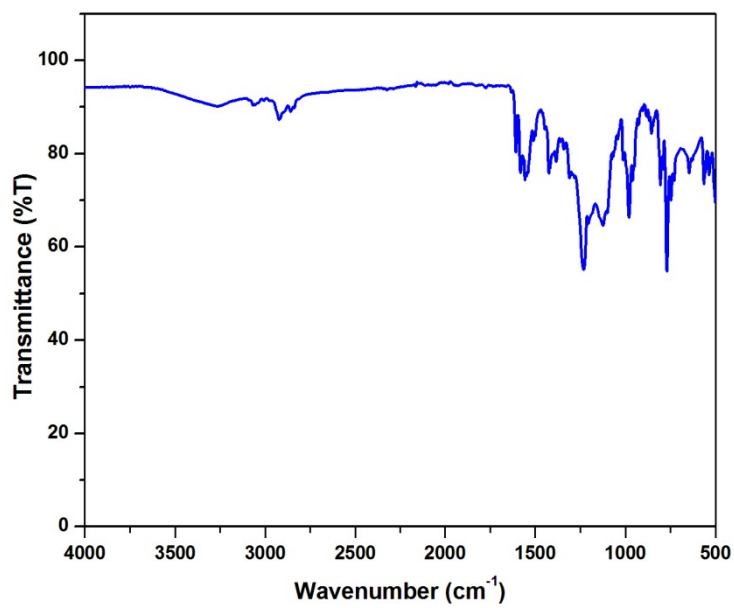

**Fig. S16** IR spectrum of **2** after UV irradiation.

## References

- (1) G. M. Sheldrick, *Acta Crystallogr. A*, 2015, **71**, 3–8.
- (2) *SMART and SAINT*; Bruker AXS Inc.: Madison, WI, 1998.
- (3) *SADABS*, Bruker AXS Inc., Madison, Wisconsin, USA, 2014.
